# Supplementary material
Source: publisher figshare collection journal article supplement (https://gsapubs.figshare.com/ndownloader/files/40027240)
Supplement: Supplementary file 1 [file 40027240]

## Sheet: Stable isotopes
Table 5. Oxygen, hydrogen and sulfur isotope compositions of different minerals and their calculated equilibrium fluids.
Sample	Mineral	δ18O(mineral)	δD(mineral)	δO(fluid)						δD(fluid)				δ34S(mineral)	δ34S(fluid)
				544 (OC)	443 (OC)	342 (OC)	331 (OC)	270 (OC)	150 (OC)	544 (OC)	331 (OC)	270 (OC)	150 (OC)
MazH	garnet	5.5		6.9	8.4	7.9				–71
MazB	garnet	6		7.4	8.9	8.4				–63
MazA	garnet	6.8		8.2	9.7	9.2				–69
Maz6	garnet	6.5		7.9	9.4	8.9				–56
Maz9	garnet	7.1		8.5	10	9.5				–52
Maz8	garnet	7.3		8.7	10.2	9.7				–79
Maz11	garnet	6.3		7.7	9.2	8.7				–78
Maz18	garnet	7		8.4	9.9	9.4				–74
Maz21	garnet	10.6		12	13.5	13				–76
MazH	magnetite	0.7		8.2	8.8	9.2
MazB	magnetite	3.4		10.9	11.5	11.9
MazA	magnetite	2.4		9.9	10.5	10.9
Maz6	magnetite	4		11.5	12.1	12.5
Maz8	magnetite	0.8		8.3	8.9	9.3
Maz11	magnetite	4.1		11.6	12.2	12.6
Maz9	magnetite	1.4		8.9	9.5	9.9
M3	magnetite	2.9		10.4	11	11.4
MazB	quartz	11.4					5.7	3.7			–89
Maz6	quartz	10.8					5.1	3.1			–86
Maz11	quartz	9.4					3.7	1.7			–85
M3	quartz	11.2					5.5	3.5			–81
Maz8	quartz	11.6					5.9	3.9			–91
Maz14	quartz	12.4					6.7	4.7			–79
Maz3	quartz	10.7					5	3			–97
MK11	sericite	4.1	–99				3.2	2			–81	–43
MA	sericite	3.8	–108				2.9	1.7			–90	–52
M3	sericite	3.2	–104				2.3	1.1			–86	–48
M16	sericite	3.9	–112				3	1.8			–94	–56
MS7	epidote	2.1	–135				1.6	0.5	–4.4		–76	–95	–159
M4	epidote	2.8	–132				2.3	1.2	–3.7		–73	–92	–156
M1	epidote	1.9	–138				1.4	0.3	–4.6		–79	–98	–162
M2	chlorite	1.2	–149						–5.9				–104
MazH	chlorite	1.8	–156						–5.3				–111
MazB	chlorite	1.4	–154						–5.7				–109
M7–6	pyrite													0.5	–0.7
Mas8	pyrite													1.3	0.1
Maz8	pyrite													–0.5	–1.7
Maz9	pyrite													0.7	–0.5
M3	pyrite													0.8	–0.4
Mkp9	pyrite													–0.1	–1.3
Mkp15	pyrite													0.9	–0.3
Sk7–6	pyrite													–0.6	–1.8
Mas8	pyrite													–0.2	–1.4
Maz8	pyrite													1.1	–0.9
Maz11	pyrite													–0.6	–1.8
MazB	chalcopyrite													–1	–2.2
M2	chalcopyrite													0.5	–0.7
Maz3	chalcopyrite													–1.4	–2.6
Maz5	chalcopyrite													0.4	–0.8
Maz8	chalcopyrite													–1.7	–2.9
Maz11	chalcopyrite													–1.8	–3
Maz14	chalcopyrite													–1.4	–2.6
Mkp15	chalcopyrite													–1.2	–2.4
MazB	bornite													–2.4	–3.6
Maz3	bornite													–2.6	–3.8
Maz8	bornite													–2.8	–4
Maz11	bornite													–2.1	–3.3
Maz11–2	bornite													–2.2	–3.4
References
Bottinga, Y., Javoy, M., 1975. Oxygen isotope partitioning among the minerals in igneous and metamorphic rocks. Reviews of Geophysics 13, 401–418.
Cole, D.R., Ripley, E.M., 1998. Oxygen isotope fractionation between chlorite and water from 170–350 °C: A preliminary assessment based on partial exchange and fluid/rock experiments. Geochimica et Cosmochimica Acta 63, 449–457.
Cole, D.R., Horita, J., Polyakov, V.B., Valley, J.W., Spicuzza, M.J., Coffey, D.W., 2004. An experimental and theoretical determination of oxygen isotope fractionation in the system magnetite–H2O from 300 to 800 °C. Geochimica et Cosmochimica Acta 68, 3569–3585.
Graham, C.M., Sheppard, S.M., Heaton, T.H., 1980. Experimental hydrogen isotope studies–I. Systematics of hydrogen isotope fractionation in the systems epidote–H2O, zoisite–H2O and AlO(OH)–H2O. Geochimica et Cosmochimica Acta 44, 353–364.
Graham, C.M., Atkinson, J., Harmon, R.S., 1984. Hydrogen isotope fractionation in the system chlorite–water. NERC 6th Progress Report of Research 1981–1984, NERC Publication Series D 25, p. 139.
Méheut, M., Lazzeri, M., Balan, E., Mauri, F., 2010. First–principles calculation of H/D isotopic fractionation between hydrous minerals and water. Geochimica et Cosmochimica Acta 74, 3874–3882.
Ohmoto, H., Rye, R.O., 1979. Isotopes of sulfur and carbon, in Barnes, H.L., ed., Geochemistry of hydrothermal ore deposits: New York, Wiley, 509−567.
Vho, A., Lanari, P., Rubatto, D., 2020. An internally–consistent database for oxygen isotope fractionation between minerals. Journal of Petrology 60, 2101–2129.
Zheng, Y.F., 1993a. Calculation of oxygen isotope fractionation in anhydrous silicate minerals. Geochimica et Cosmochimica Acta 57, 1079–1091.
Zheng, Y.F., 1993b. Calculation of oxygen isotope fractionation in hydroxyl–bearing silicates. Earth and Planetary Science Letters 120, 247–263.
